# Supplementary material for: Tumor RNA-Transfected Dendritic Cells Generated From Induced Pluripotent Stem Cells Induces Anti-Tumor Immunity
Source: Research Square preprint supplement (doi:10.21203/rs.3.rs-923680/v1), 2021-10-05
Supplement: Supplementary file 1 [file a1fa2c7ed789a0f0769660a9.docx]

Tumor RNA-transfected dendritic cells generated from induced pluripotent stem cells induces anti-tumor immunity

Shimpei Maruoka1, Toshiyasu Ojima*1, Hiromitsu Iwamoto1, Junya Kitadani1, Hirotaka Tabata1, Shinta Tominaga1, Masahiro Katsuda1, Keiji Hayata1, Akihiro Takeuchi1,

Hiroki Yamaue1

1 Second Department of Surgery, School of Medicine, Wakayama Medical University, Wakayama, Japan.

*Correspondence and reprints:

Toshiyasu Ojima, M.D. Ph.D., Second Department of Surgery, School of Medicine, Wakayama Medical University 811-1, Kimiidera, Wakayama 641-8510, Japan.

Phone: 81-73-441-0613,

Fax: 81-73-446-6566,

E-mail:tojima@wakayama-med.ac.jp

**Supplementary information. 3**

**List of 12 candidate neoantigens. For experimental validation, candidates were prioritised based on our criteria, (1) high predicted affinity (<10nM) somatic single nucleotide variations, (2) affinity of mutant type peptides ≥ wild type peptides, and (3) high mutant RNA expression (≥100).**
